# Supplementary material
Source: publisher figshare collection journal article supplement (https://gsapubs.figshare.com/ndownloader/files/22759442)
Supplement: Supplementary file 1 [file 22759442]

## Methods

The tomographic images are obtained by using the RES2DINV inversion package for determining the L1-norm resistivity models based on the raw resistivity measurements (Loke et al., 2003). The horizontal node spacing of the resistivity models is 50 m, whereas the vertical spacing is ~20 m (nodes located at 17.1, 34.2, 53.0, 73.7 and 96.4 m below the surface).

## Reference

Loke, M.H., Acworth, I., and Dahlin, T., 2003, A comparison of smooth and blocky inversion methods in 2-D electrical imaging surveys: *Exploration Geophysics*, v. 34, p. 182–187, doi: 10.1071/EG03182.

**Table DR1.** Start and end points of resistivity profiles (locations of the current electrode closest to the voltage electrodes of dipole-dipole configuration)

| Profile | Start point (long) | Start point (lat) | End point (long) | End point (lat) |
|---------|--------------------|-------------------|------------------|-----------------|
| A1      | -53.0013           | -16.8279          | -53.0016         | -16.8310        |
| A2      | -53.0008           | -16.8274          | -53.0034         | -16.8293        |
| B1      | -53.0064           | -16.8147          | -53.0145         | -16.8146        |
| B2      | -53.0010           | -16.8073          | -53.0039         | -16.8067        |
| B3      | -53.0010           | -16.8073          | -53.0015         | -16.8047        |

## Resistivity modeling

The convergence to the final resistivity models is rapid (3 to 6 iterations), and the errors (rms residuals) of the resistivity models are low (3.2–8.7%), particularly given the complexity of the subsurface resistivity structures (Table DR2).

**Table DR2.** Number of iterations and errors of the final resistivity models

| Profile | Number of iterations | Error (%) |
|---------|----------------------|-----------|
| A1      | 4                    | 7.7       |
| A2      | 3                    | 8.1       |
| B1      | 5                    | 8.7       |
| B2      | 4                    | 5.4       |
| B3      | 6                    | 3.2       |

### Gravity data processing

Bouguer ( $2670 \text{ kg/m}^3$ ) and terrain corrections have been applied. 1967 International Gravity formula is used in the calculation of latitude-dependent theoretical gravity. Altitude and location of measurement points were obtained by differential GPS. All data are tied to the Brazilian Gravimetric Network by a local reference gravity station at Ponte Branca, Mato Grosso.

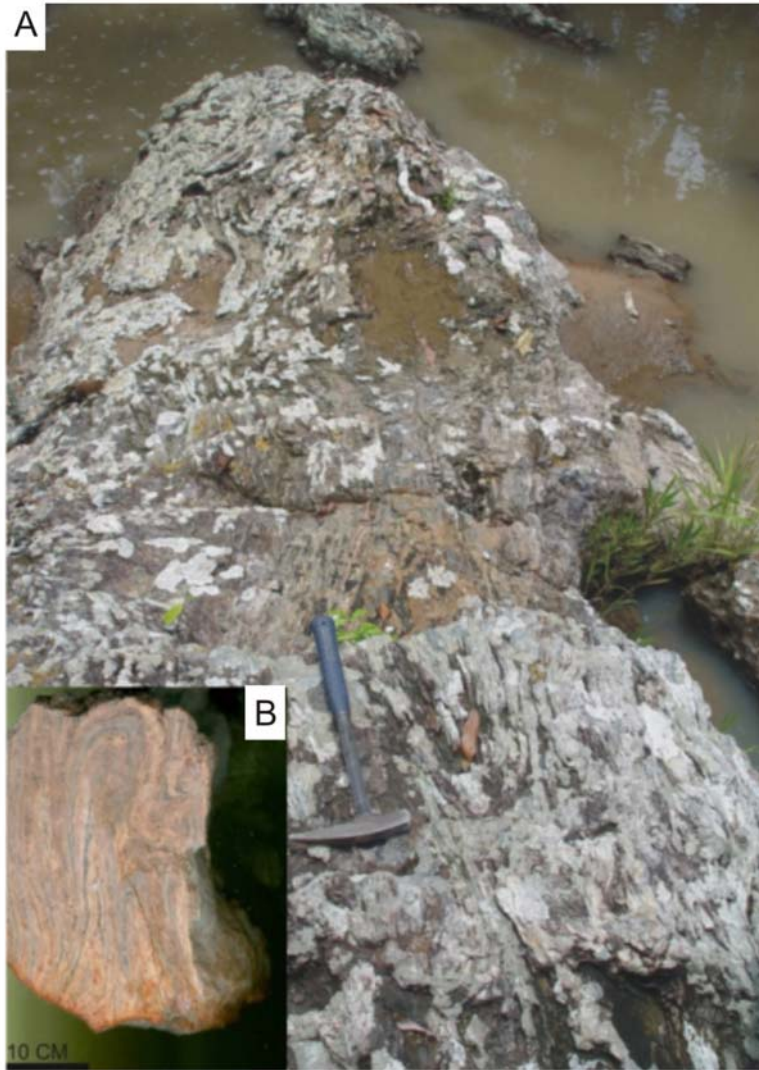

**Figure DR1.** A. Meter-scale impact melt rock of sedimentary origin with internal flow texture observed near Profile B3 (Fig. 3 in the main text); B. Polished sample from the outcrop in A showing centimetre-scale flow banding. Flow lines are defined by glassy (white bands) alternating with cryptocrystalline quartz-rich bands (pink bands). Similar melt lumps were also documented in Engelhardt et al. (1992).
